# Supplementary material for: Phytochemical Analysis Using UPLC-MS/MS Combined with Network Pharmacology Methods to Explore the Biomarkers for the Quality Control of Lingguizhugan Decoction
Source: Evid Based Complement Alternat Med. 2021 Dec 22;2021:7849032. doi: 10.1155/2021/7849032 (PMC8716202; doi:10.1155/2021/7849032)
Supplement: Supplementary Materials — Table S1: characterization of chemical components derived from LGZG by UPLC-Q/TOF-MS/MS. [file 7849032.f1.doc]

**Tab.S1 Characterization of chemical components derived from LGZG by UPLC-Q/TOF-MS/MS**

| **NO.** | **Ion Type** | **RT**  **(min)** | **Formula** | **Extraction Mass**  **(m/z)** | **Experimental Mass**  **(m/z)** | **Error**  **(ppm)** | | | | | | **Fragement Ion(m/z)** | | | | | | | | | | | | | | | | | | | **Identification** | | | | | | | | | | | | | | **Type** | | | | |
| --- | --- | --- | --- | --- | --- | --- | --- | --- | --- | --- | --- | --- | --- | --- | --- | --- | --- | --- | --- | --- | --- | --- | --- | --- | --- | --- | --- | --- | --- | --- | --- | --- | --- | --- | --- | --- | --- | --- | --- | --- | --- | --- | --- | --- | --- | --- | --- | --- | --- |
| 1 | [M-H]- | 0.83 | C12H22O11 | 341.1090 | 341.1090 | 0.2 | | | | | | 341.1108(M-H,C12H21O11);179.0565(M-H-C6H10O5,C6H11O6);161.0461 (M-H-C6H12O6,C6H9O5);119.0354(M-H-C6H10O5-C2H4O2,C4H7O4); | | | | | | | | | | | | | | | | | | | Lactose | | | | | | | | | | | | | | O | | | | |
| 2 | [M-H]- | 0.84 | C7H12O6 | 191.0561 | 191.0562 | 0.4 | | | | | | 191.0569(M-H,C7H11O6);111.0097(M-H-CO2-2H2O,C6H7O2) | | | | | | | | | | | | | | | | | | | Quinic acid | | | | | | | | | | | | | | OA | | | | |
| 3 | [M-H]- | 0.89 | C4H6O5 | 133.0143 | 133.0143 | 0.7 | | | | | | 133.0149(M-H,C4H5O5);115.0039(M-H-H2O,C4H3O4) | | | | | | | | | | | | | | | | | | | L-Malic acid | | | | | | | | | | | | | | OA | | | | |
| 4 | [M-H]- | 1.09 | C24H42O21 | 665.2146 | 665.2144 | -0.3 | | | | | | 665.2164(M-H,C24H41O21);341.1112(M-H-2C6H10O5,C12H21O11);179.0570 (M-H-3C6H10O5,C6H11O6);161.0467(M-H-3C6H10O5-H2O,C6H9O5) | | | | | | | | | | | | | | | | | | | Nistose | | | | | | | | | | | | | | O | | | | |
| 5 | [M+H]+ | 1.10 | C10H13N5O5 | 284.0990 | 284.0990 | 0.1 | | | | | | 284.1232(M+H,C10H14N5O5)152.0566(M+H-C5H8O4,C5H6N5O);135.0298 (M+H-C5H8O4-NH3,C5H3N4O) | | | | | | | | | | | | | | | | | | | 2-Hydroxyadenosine | | | | | | | | | | | | | | AL | | | | |
| [M-H]- | 1.15 | C10H13N5O5 | 282.0845 | 282.0845 | 0.3 | | | | | | 282.0847(M-H, C10H12N5O5); 150.0427(M-H-C5H8O4, C5H4N5O); 133.0161 (M-H-C5H8O4-NH3,C5HN4O);108.0204( M-H-C5H8O4-CH2N2, C4H2N3O); | | | | | | | | | | | | | | | | | | |
| 6 | [M+H]+ | 1.10 | C10H13N5O4 | 268.1040 | 268.1038 | -0.9 | | | | | | 268.1031(M+H, C10H14N5O4); 136.0614(M+H-C5H8O4, C5H6N5); 119.0345(M+H-C5H8O4-NH3,C5H3N4) | | | | | | | | | | | | | | | | | | | Adenosine | | | | | | | | | | | | | | AL | | | | |
| 7 | [M+H]+ | 1.41 | C11H14O5 | 227.0914 | 227.0916 | 0.8 | | | | | | 227.1386(M+H, C11H15O5); 167.0702(M+H-C2H4O2, C9H11O3); 149.0611 (M+H -C2H4O2-H2O, C9H9O2); 137.0593(M+H-C2H4O2-CH2O, C8H9O2); 131.0481 (M+H-C2H4O2-2H2O, C9H7O); 123.0432(M+H-C2H4O2-CO2, C8H11O); | | | | | | | | | | | | | | | | | | | Genipin | | | | | | | | | | | | | | L | | | | |
| 8 | [M-H]- | 1.51 | C10H12O4 | 195.0663 | 195.0663 | 0 | | | | | | 165.0194(M-H-2CH3, C8H5O4); 137.0243(M-H-2CH3-CO, C7H5O3); | | | | | | | | | | | | | | | | | | | Cantharidin | | | | | | | | | | | | | | L | | | | |
| 9 | [M-H]- | 2.19 | C8H8O4 | 167.0350 | 167.0351 | 0.5 | | | | | | 167.0342(M-H,C8H7O4);137.0252(M-H-CH2O, C7H5O3);136.0174(M-H -CH3O, C7H4O3);123.0449(M-H-CO2, C7H7O2); 121.0290(M-H-CH2O2, C7H5O2); 109.0301(M-H-CO-CH2O, C6H5O2);108.0221(M-H-CO-CH3O, C6H4O2) | | | | | | | | | | | | | | | | | | | Vanillic acid | | | | | | | | | | | | | | OA | | | | |
| 10 | [M-H]- | 2.68 | C7H6O4 | 153.0193 | 153.0197 | 0.4 | | | | | | 153.0209(M-H,C7H5O4);109.0302(M-H-CO2,C6H5O2);  108.0221(M-H-COOH,C6H4O2) | | | | | | | | | | | | | | | | | | | 3,4-Dihydroxybenzoic acid | | | | | | | | | | | | | | OA | | | | |
| 11 | [M-H]- | 2.99 | C15H20O10 | 359.0983 | 359.0981 | -0.3 | | | | | | 197.0415(M-H-C6H10O5, C9H9O5);182.0227(M-H-C6H10O5-CH3, C8H6O5);138.0332 (M-H-C6H10O5-CH3-CO2, C7H6O3);123.0091(M-H-C6H10O5-CH3-CO2-CH3, C6H3O3) | | | | | | | | | | | | | | | | | | | | | | | | | | Glucosyringic acid | | | | | | | OA | | | | |
| 12 | [M-H]- | 3.28 | C16H18O9 | 353.0878 | 353.0877 | -0.2 | | | | | | 353.0859(M-H, C16H17O9);191.0570(M-H-C9H6O3, C7H11O6); 179.0360(M-H-C7H10O5,C9H7O4);135.0460(M-H-C7H10O5-CO2,C8H7O2) | | | | | | | | | | | | | | | | Neochlorogenic acid* | | | | | | | | | | | | | | | | | P | | | | |
| 13 | [M-H]- | 4.38 | C7H6O3 | 137.0244 | 137.0245 | 0.5 | | | | | | 137.0247(M-H,C7H5O3);136.0166(M-2H,C7H4O3);  119.0147(M-H-H2O,C7H3O2);108.0218(M-H-CHO,C6H4O2) | | | | | | | | | | | | | | | | | | | Protocatechuic aldehyde | | | | | | | | | | | | | | OA | | | | |
| 14 | [M-H]- | 4.56 | C9H10O3 | 165.0557 | 165.0564 | 1 | | | | | | 165.0554(M-H,C9H9O3);147.8885(M-H-H2O ,C9H7O2);  121.0653(M-H-CO2,C8H9O);119.0498(M-H-CO2-H2,C8H7O) | | | | 3-(2-Hydroxyphenyl)propionic acid | | | | | | | | | | | | | | | | | | | | | | | | | | | | | OA | | | | |
| 15 | [M-H]- | 7.02 | C16H18O9 | 353.0878 | 353.0876 | -0.7 | | | | | | 191.0568(M-H-C9H6O3,C7H11O6) | | | | Chlorogenic acid* | | | | | | | | | | | | | | | | | | | | | | | | | | | | | | | P | | |
| 16 | [M-H]- | 7.88 | C9H8O4 | 179.0350 | 179.0349 | -0.4 | | | | | | 179.0149(M-H, C9H7O4);135.0459(M-H-CO2, C8H7O2) | | | | | | | | | | | | | | | | | | | Caffeic acid* | | | | | | | | | | | | | | OA | | | | |
| 17 | [M-H]- | 8.50 | C16H18O9 | 353.0878 | 353.0877 | 0.2 | | | | | | 353.0915(M-H, C16H17O9);191.0571(M-H-C9H6O3,C7H11O6);179.0348 (M-H -C7H10O5,C9H7O4);173.0449(M-H-C9H6O3-H2O,C7H9O5);161.0249(M-H -C7H10O5-H2O,C9H5O3);135.0447(M-H-C7H10O5-CO2,C8H7O2) | | | | | | | | | | | | | | | | | | | Cryptochlorogenic acid* | | | | | | | | | | | | | | P | | | | |
| 18 | [M+H]+ | 8.75 | C18H19NO4 | 314.1387 | 314.1388 | 0.4 | | | | | | 297.1135(M+H-NH3, C18H17O4) ;282.0880(M+H-NH3-CH3, C17H14O4) ; 267.0649 (M+H-NH3-CH2O, C17H15O3); 265.0876(M+H-NH3-CH2-H2O, C17H13O3); 222.0682(M+H-NH3-CH2-H2O-C2H3-O, C15H10O2) | | | | | | | | | | | | | | | | | | | Norisoboldine | | | | | | | | | | | | | | AL | | | | |
| 19 | [M-H]- | 8.89 | C9H10O5 | 197.0456 | 197.0455 | -0.3 | | | | | | 197.0454(M-H, C9H9O5);182.0251(M-H-CH3, C8H6O5); 166.9980(M-H-C2H6,C7H3O5);123.0091(M-H-C2H6-CO2, C6H3O3) | | | | | | | | | | | | | | | | | | | Ethyl gallate | | | | | | | | | | | | | | OA | | | | |
| 20 | [M-H]- | 9.30 | C30H26O12 | 577.1352 | 577.1351 | -0.1 | | | | | | 577.1364(M-H,C30H25O12);451.1035(M-H-C6H4O2-H2O,C24H19O9);425.0885(M-H-C6H4O2-H2O-C2H2,C22H17O9);407.0780(M-H-C6H4O2-H2O-C2H2-H2O,C22H15O8);289.0646(M-H-C15H12O6,C15H13O6);125.0248(M-H-C15H12O6-C9H8O3,C6H5O3) | | | | | | | | | | | | | | | | | | | Procyanidin B1 | | | | | | | | | | | | | | F | | | | |
| 21 | [M-H]- | 10.00 | C15H12O6 | 287.0561 | 287.0560 | -0.3 | | | | | | 287.0574(M-H, C15H11O6);269.0439(M-H-H2O,C15H9O5);259.0639(M-H -CO,C14H11O5);243.0297(M-H-CO-O,C14H11O4);175.0408(M-H-CO-C4H4O2, C10H7O3);137.0244(M-H-C8H6O3,C7H5O3);125.0246(M-H-C9H6O3,C6H5O3); 121.0297(M-H-C8H6O3-O,C7H5O2);109.0298(M-H-C8H6O3-CO,C6H5O2) | | | | | | | | | | | | | | | | | | | Dihydrokaempferol | | | | | | | | | | | | | | F | | | | |
| 22 | [M+H]+ | 10.09 | C17H20N4O6 | 377.1456 | 377.1454 | -0.4 | | | | | | 377.1480(M+H,C17H21N4O6);359.1358(M+H-H2O,C17H19N4O5);243.0883  (M+H-C5H10O4,C12H11N4O2) ;200.0826(M+H-C5H10O4-CONH,C11H10N3O); 172.0889(M+H-C5H10O4-CONH-CO,C10H10N3) | | | | | | | | | | | | | | | | | | | Vitamin B2 | | | | | | | | | | | | | | AL | | | | |
| 23 | [M+H]+ | 10.17 | C15H16O4 | 261.1121 | 261.1122 | 0.1 | | | | | | 261.1306(M+H,C15H17O4);217.1222(M+H-CO2,C14H17O2);  199.1125(M+H-CO2-H2O,C14H15O);184.0869(M+H-CO2-H2O-CH3,C13H12O) | | | | | | | | | | | | | | | | | | | Linderane | | | | | | | | | | | | | | L | | | | |
| 24 | [M+H]+ | 10.45 | C27H30O15 | 595.1658 | 595.1661 | 0.6 | | | | | | 595.1651(M+H, C27H31O15);577.1564(M+H-H2O, C27H29O14); 559.1473(M+H-2H2O, C27H27O13); 541.1338(M+H-3H2O, C27H25O12); 481.1128(M+H-3H2O-C2H4O2, C25H21O10); 421.0922(M+H-3H2O-2C2H4O2, C23H17O8); 325.0715 (M+H -4C2H4O2-CH2O, C18H13O6);295.0603(M+H-5C2H4O2, C17H11O5) | | | | | | | | | | | | | | | | | | | Vicenin II | | | | | | | | | | | | | | F | | | | |
| 25 | [M-H]- | 10.68 | C9H8O3 | 163.0401 | 163.0402 | 1 | | | | | | 163.0143(M-H, C9H7O3)119.0503(M-H-CO2, C8H7O);  117.0359(M-H-CH2O2, C8H5O) | | | | | | | | | | | | | | | | | | | 2-Hydroxycinnamic acid | | | | | | | | | | | | | | OA | | | | |
| 26 | [M-H]- | 10.68 | C9H8O3 | 163.0401 | 163.0402 | 1 | | | | | | 163.0143(M-H, C9H7O3),119.0503(M-H-CO2,C8H7O) | | | | | | | | | | | Ttrans-4-Hydroxycinnamic acid | | | | | | | | | | | | | | | | | | | | | | OA | | | | |
| 27 | [M+H]+ | 10.93 | C19H23NO4 | 330.1700 | 330.1701 | 0.2 | | | | | | 330.1699(M+H, C19H24NO4) ;299.1281(M+H-CH3O, C18H21NO3);207.0786 (M+H-C7H7O2, C12H17NO2);192.1014(M+H-C7H7O2-CH3, C11H14NO2) | | | | | | | | | | | | | | | | | | | Sinomenine | | | | | | | | | | | | | | AL | | | | |
| 28 | [M-H]- | 11.13 | C45H38O18 | 865.1985 | 865.1981 | -0.3 | | | | | | 865.2025(M-H, C45H37O18);577.1380(M-H-C15H12O6, C30H25O12);289.0725 (M-H-2C15H12O6, C15H13O6);125.0248(M-H-2C15H12O6-C9H8O3, C6H5O3) | | | | | | | | | | | | | | | | | | | Procyanidin C1 | | | | | | | | | | | | | | F | | | | |
| 29 | [M+H]+ | 11.54 | C10H8O4 | 193.0495 | 193.0494 | -0.5 | | | | | | 193.0497(M+H, C10H9O4); 178.0255(M+H-CH3,C9H6O4); 150.0310(M+H-CH3-CO,C8H6O3); 133.0280(M+H-CH3-CO-OH, C8H5O2); 122.0360(M+H-CH3-2CO,C7H6O2); 105.0326(M+H-CH3-2CO-OH, C7H5O) | | | | | | | | | | | | | | | | | | | Scopoletin | | | | | | | | | | | | | | P | | | | |
| 30 | [M+H]+ | 11.83 | C26H28O14 | 565.1552 | 565.1550 | 0 | | | | | | 565.1550(M+H, C26H29O14);547.1466(M+H-H2O,C26H27O13); 529.1356(M+H-2H2O, C26H25O12);511.1238(M+H-3H2O, C26H23O11); 427.1021(M+H-H2O-C4H8O4,C22H19O9);409.0933(M+H-2H3O -C4H8O4,C22H17O8); 391.0817(M+H-3H2O-C4H8O4, C22H15O7) | | | | | | | | | | | | | | | | | | | Schaftoside | | | | | | | | | | | | | | F | | | | |
| [M-H]- | 12.25 | C26H28O14 | 563.1406 | 563.1411 | 0.9 | | | | | | 563.1431(M-H,C26H27O14);503.1198(M-H-C2H4O2, C24H23O12);473.1102 (M-H-C3H6O3, C23H21O11);443.0990(M-H-C4H8O4, C22H19O10);383.0781 (M-H-C3H6O3-C3H6O3, C20H15O8);353.0678(M-H-C4H8O4-C3H6O3, C19H13O7) | | | | | | | | | | | | | | | | | | |
| 31 | [M-H]- | 11.86 | C20H32O7 | 383.2075 | 383.2076 | 0.2 | | | | | | 383.2087(M-H,C20H31O7);381.1920(M-3H,C20H29O7);  365.1989(M-H-H2O,C20H29O6) | | | | | | | | | | | | | | | | | | | 3-Deoxyryanodol | | | | | | | | | | | | | | O | | | | |
| 32 | [M-H]- | 12.12 | C32H40O19 | 727.2091 | 727.2097 | 0.9 | | | | | | 727.2093(M-H, C32H39O19);565.1569(M-H-C6H10O5, C26H29O14) | | | | | | | | | | | | | | | | | | | Parishin C | | | | | | | | | | | | | | O | | | | |
| 33 | [M+H]+ | 12.22 | C21H20O9 | 417.1180 | 417.1181 | 0.2 | | | | | | 417.1174(M+H, C21H21O9); 255.0664(M+H-C6H10O5, C15H11O4); 227.0770(M+H- C6H10O5-CO, C14H11O3); 199.0770(M+H-C6H10O5-2CO, C13H11O2) | | | | | | | | | | | | | | | | | | | Chrysophanein | | | | | | | | | | | | | | AN | | | | |
| 34 | [M+H]+ | 12.22 | C21H20O9 | 417.1180 | 417.1181 | 0.4 | | | | | | 417.1174(M+H, C21H21O9);255.0664(M+H-C6H10O5,C15H11O4) | | | | | | | | | | | | | | | | | | | Daidzin | | | | | | | | | | | | | | F | | | | |
| 35 | [M-H]- | 12.31 | C27H32O14 | 579.1719 | 579.1717 | -0.4 | | | | | | 579.1730(M-H,C27H31O14);255.0668(M-H-C6H10O4-C6H10O5-O,C15H11O4); 135.0089 (M-H-C6H10O4-C6H10O5-C8H8O-O,C7H3O3);  119.0503(M-H-C6H10O4-C6H10O5-C7H4O4,C8H7O) | | | | | | | | | | | | | | | | | | | Naringin | | | | | | | | | | | | | | F | | | | |
| 36 | [M-H]- | 12.71 | C9H8O2 | 147.0452 | 147.0453 | 0.9 | | | | | | 147.0458(M-H,C9H7O2);129.0348(M-H-H2O,C9H5O);  119.0500(M-H-CO,C8H7O);117.0346(M-H-CO-H2,C8H5O) | | | | | | | | | | | | | 2-Hydroxy cinnamaldehyde | | | | | | | | | | | | | | | | | | | | OA | | | | |
| 37 | [M+H]+ | 12.99 | C27H32O14 | 581.1865 | 581.1866 | 0.2 | | | | | | 581.1965(M+H, C27H33O14);257.0810(M+H-C6H10O4-C6H10O5-O, C15H13O4) ;137.0229(M+H-C6H10O4-C6H10O5-C8H8O-O, C7H5O3) | | | | | | | | | | | | | | | | | | | Naringin | | | | | | | | | | | | | | F | | | | |
| 38 | [M+H]+ | 13.16 | C22H22O10 | 447.1286 | 447.1283 | -0.6 | | | | | | 447.1289(M+H,C22H23O10);285.0756(M+H-C6H10O5, C16H13O5);  270.0521 (M+H-C6H10O5-CH3, C15H10O5) | | | | | | | | | | | | | | | | | | | Calycosin-7-O-glucoside | | | | | | | | | | | | | | F | | | | |
| 39 | [M-H]- | 13.19 | C15H12O7 | 303.0510 | 303.0510 | 0 | | | | | | 285.0498(M-H-H2O, C15H9O6); 275.0530 (M-H-CO, C14H11O6); 259.0654(M-H-CO-O, C14H11O5) ; 178.9994(M-H-C6H3O2-H2O, C9H6O4); 125.0251(M-H-C9H6O4, C6H5O3) | | | | | | | | | | | | | | | | | | | | | | | Taxifolin | | | | | | | | | | F | | | | |
| 40 | [M+H]+ | 13.20 | C21H22O9 | 419.1337 | 419.1333 | -0.8 | | | | | | 419.1342(M+H, C21H23O9);257.0815(M+H-C6H10O5, C15H13O4); 147.0438(M+H -C6H10O5-C6H6O2, C9H7O2) ;137.0235(M+H-C6H10O5-C8H8O, C7H5O3) | | | | | | | | | | | | | | | | | | | Neoliquiritin | | | | | | | | | | | | | | F | | | | |
| [M-H]- | 13.31 | C21H22O9 | 417.1191 | 417.1198 | 1.7 | | | | | | 417.1195(M-H,C21H21O9);255.0681(M-H-C6H10O5,C15H11O4);135.0093 (M-H-C6H10O5-C8H8O,C7H3O3);119.0511(M-H-C6H10O5-C7H4O3,C8H7O) | | | | | | | | | | | | | | | | | | |
| 41 | [M+H]+ | 13.21 | C15H12O4 | 257.0808 | 257.0810 | 0.8 | | | | | | 257.0805(M+H, C15H13O4); 165.0691(M+H-C6H4O, C9H9O3); 147.0439(M+H-C6H5O-OH, C9H7O2); 137.0234(M+H-C8H8O, C7H5O3); 119.0487(M+H-C8H8O-H2O, C7H3O2); 109.0277(M+H-C8H8O-CO, C6H5O2) | | | | | | | | | | | | | | | | | | | Liquiritigenin* | | | | | | | | | | | | | | F | | | | |
| 42 | [M-H]- | 13.22 | C11H10O5 | 221.0455 | 221.0454 | -0.5 | | | | | | 221.1466(M-H, C11H9O5);162.0340(M-H-CO2-CH3,C9H6O3) | | | | | | | | | | | | | | | | | | | Isofraxidin | | | | | | | | | | | | | | P | | | | |
| 43 | [M+H]+ | 13.44 | C21H22O9 | 419.1337 | 419.1333 | -0.9 | | | | | | 419.1405(M+H, C21H23O9);257.0816(M+H-C6H10O5, C15H13O4); 147.0438 (M+H-C6H10O5-C6H6O2, C9H7O2) ;137.0235(M+H-C6H10O5-C8H8O, C7H5O3) | | | | | | | | | | | | | | | | | | | Liquiritin* | | | | | | | | | | | | | | F | | | | |
| [M-H]- | 13.58 | C21H22O9 | 417.1191 | 417.1194 | 0.7 | | | | | | 417.1217(M-H,C21H21O9);255.0702(M-H-C6H10O5,C15H11O4);148.0173 (M-H-C6H10O5-C6H3O2,C9H8O2);135.0100(M-H-C6H10O5-C8H8O,C7H3O3); 119.0515(M-H-C6H10O5-C7H4O3,C8H7O) | | | | | | | | | | | | | | | | | | |
| 44 | [M+H]+ | 13.47 | C27H30O14 | 579.1708 | 579.1705 | -0.6 | | | | | | 579.1723(M+H, C27H31O14); 561.1614(M+H-H2O, C27H29O13); 543.1511 (M+H-2H2O, C27H27O12); 525.1408(M+H-3H2O, C27H25O11); 495.1294 (M+H-3H2O-CH2O, C26H23O10); 459.1176(M+H-C4H8O4, C23H23O10); 325.0711 (M+H-7CH2O-C2H4O, C18H13O6); 295.0597(M+H-8CH2O-C2H4O, C17H11O5) | | | | | | | | | | | | | | | | | | | Isoviolanthin | | | | | | | | | | | | | | F | | | | |
| 45 | [M+H]+ | 13.46 | C26H30O13 | 551.1759 | 551.1756 | -0.5 | | | | | | 551.1930(M+H, C26H31O13); 257.0814(M+H-C5H8O4-C6H10O5,C15H13O4); 147.0439(M+H-C5H8O4-C6H10O5-C6H6O2,C9H7O2); 137.0230(M+H-C5H8O4-C6H10O5-C8H8O,C7H5O3) | | | | | | | | | | | | | | | | | | | Liquiritin apioside | | | | | | | | | | | | | | F | | | | |
| [M-H]- | 13.80 | C26H30O13 | 549.1614 | 549.1616 | 0.4 | | | | | | 549.1721(M-H,C26H29O13);255.0704(M-H-C6H10O5-C5H8O4,C15H11O4); 135.0106(M-H-C6H10O5-C5H8O4-C8H8O,C7H3O3);  119.0517(M-H-C6H10O5-C5H8O4-C7H4O3,C8H7O) | | | | | | | | | | | | | | | | | | |
| 46 | [M-H]- | 14.14 | C10H10O3 | 177.0559 | 177.0559 | 0.8 | | | | | | 177.0554(M-H, C10H9O3); 162.0325(M-H-CH3, C9H6O3); 117.0339(M-H-CH3-COOH, C8H5O); | | | | | | | | | | | | | | | | | | | 2-Methoxycinnamic acid | | | | | | | | | | | | | | P | | | | |
| 47 | [M-H]- | 14.14 | C17H16O6 | 315.0784 | 315.0876 | 0.6 | | | | | | 315.0874(M-H,C17H15O6);271.1000(M-H-CO-O,C16H15O4);256.0682 (M-H-CO-O-CH3,C15H12O4);135.0465(M-H-CO-O-CH3-C7H5O2,C8H7O2); 109.0302(M-H-CO-O-CH3-C7H5O2-C2H2,C6H5O2) | | | | | | | | | | | | | | | | | | | 1,2,3,7-Tetramethoxyxanthone | | | | | | | | | | | | | | F | | | | |
| 48 | [M+H]+ | 14.28 | C9H6O2 | 147.0441 | 147.0442 | 0.8 | | | | | | 147.0443(M+H, C9H7O2);103.0540(M+H-CO2,C8H7) | | | | | | | | | | | | | | | | | | | Coumarin* | | | | | | | | | | | | | | P | | | | |
| 49 | [M+H]+ | 15.11 | C15H10O5 | 271.0601 | 271.0603 | 0 | | | | | | 271.0607(M+H, C15H11O5); 161.0236(M+H-C6H6O2, C9H5O3); 137.0225(M+H-C8H6O2, C7H5O3); 135.0427(M+H-C7H4O3, C8H7O2) | | | | | | | | | | | | | | | | | | | 3',4',7-Trihydroxyflavone | | | | | | | | | | | | | | F | | | | |
| [M-H]- | 15.44 | C15H10O5 | 269.0456 | 269.0456 | 0 | | | | | | 269.0469(M-H,C15H9O5);135.0093(M-H-C8H6O2,C7H3O3); 133.0300(M-H-C7H4O3,C8H5O2) | | | | | | | | | | | | | | | | | | |
| 50 | [M+H]+ | 15.11 | C15H10O5 | 271.0601 | 271.0603 | 0.9 | | | | | | 271.0607(M+H, C15H11O5); 153.0168(M+H-C8H6O, C7H5O4); 119.0501(M+H-C7H4O4, C8H7O) | | | | | | | | | | | | | | | | | | | Genistein | | | | | | | | | | | | | | F | | | | |
| [M-H]- | 15.44 | C15H10O5 | 269.0460 | 269.0456 | 0 | | | | | | 269.0469(M-H,C15H9O5);133.0300(M-H-C6H4O2-CO,C8H5O2) | | | | | | | | | | | | | | | | | | |
| 51 | [M+H]+ | 15.16 | C15H10O7 | 303.0499 | 303.0497 | -0.9 | | | | | | 303.0533(M+H, C15H11O7); 285.0398(M+H-H2O, C15H9O6); 257.0444(M+H-H2O-CO, C14H9O5); 229.0498(M+H-H2O-2CO, C13H9O4); 153.0170(M+H-C8H6O3,C7H5O4); 137.0207(M+H-C8H6O3-O,C7H5O3); | | | | | | | | | | | | | | | | | | | Quercetin | | | | | | | | | | | | | | F | | | | |
| 52 | [M-H]- | 15.22 | C25H24O12 | 515.1195 | 515.1191 | -0.9 | | | | | | 515.1194(M-H, C25H23O12); 353.0898(M-H-C9H6O3,C16H17O9); 191.0567 (M-H-2C9H6O3,C7H11O6); 179.0354(M-H-C16H16O8,C9H7O4); 173.0462 (M-H-2C9H6O3-H2O,C7H9O5); 135.0463(M-H-C16H16O8-CO2,C8H7O2) | | | | | | | | | | | | | | | | | | | Isochlorogenic acid B* | | | | | | | | | | | | | | P | | | | |
| 53 | [M+H]+ | 15.36 | C27H28O14 | 577.1552 | 577.1546 | -1 | | | | | | 577.1639(M+H, C27H29O14); 559.1483(M+H-H2O, C27H27O13); 313.0705 (M+H-C11H20O7,C16H9O7); 295.0610(M+H-C11H20O7-H2O, C16H7O6) | | | | | | | | | | | | | | | | | | | Cassiaoccidentalin B | | | | | | | | | | | | | | F | | | | |
| 54 | [M-H]- | 15.41 | C25H24O12 | 515.1195 | 515.1188 | -1.3 | | | | | | 515.1771(M-H, C25H23O12); 353.0885(M-H-C9H6O3,C16H17O9); 191.0560 (M-H-2C9H6O3,C7H11O6); 179.0359(M-H-C16H16O8,C9H7O4); 135.0452(M-H-C16H16O8-CO2,C8H7O2) | | | | | | | | | | | | | | | | | | | Isochlorogenic acid A* | | | | | | | | | | | | | | P | | | | |
| 55 | [M+H]+ | 15.57 | C22H22O11 | 463.1235 | 463.1237 | 0.4 | | | | | | 463.1182(M+H, C22H23O11);301.0709(M+H-C6H10O5, C16H13O6) ;286.0456(M+H-C6H10O5-CH3, C15H10O6); | | | | | | | | | | | | | | | | | | | Tectoridin | | | | | | | | | | | | | | F | | | | |
| 56 | [M-H]- | 15.65 | C15H10O5 | 269.0456 | 269.0456 | 0.2 | | | | | | 269.0462(M-H, C15H9O5);241.0500(M-H-CO, C14H9O4);213.0562(M-H-2CO,C13H9O3) | | | | | | | | | | | | | | | | | | | | | | | | | | | | | | Emodin | | | AN | | | | |
| 57 | [M-H]- | 15.66 | C16H12O6 | 299.0561 | 299.0564 | 1 | | | | | | 299.0577(M-H,C16H11O6);240.0441(M-H-CH3O-CO, C14H8O4); 239.0361(M-H-CH3O-CO-H, C14H7O4);212.0488(M-H-CH3O-2CO, C13H8O3); | | | | | | | | | | | | | | | | | | | Xanthorin | | | | | | | | | | | | | | AN | | | | |
| 58 | [M-H]- | 15.87 | C16H14O6 | 301.0718 | 301.0720 | 0.9 | | | | | | 301.0723(M-H,C16H13O6);286.0491(M-H-CH3, C15H10O6);  191.0351 (M-H-C6H6O2,C10H7O4);161.0253(M-H-C7H7O3-H,C9H5O3);  150.0325(M-H-CH3-C7H4O3,C8H6O3) | | | | | | | | | | | | | | | | | | | 3,4,3',4'-Tetrahydroxy-2-methoxychalcone | | | | | | | | | | | | | | F | | | | |
| 59 | [M-H]- | 15.94 | C21H22O10 | 433.1140 | 433.1138 | -0.4 | | | | | | 433.1161(M-H,C21H21O10);271.0637(M-H-C6H10O5, C15H11O5); 151.0048(M-H-C6H10O5-C8H8O,C7H3O4);119.0511(M-H-C6H10O5-C7H4O4,C8H7O) | | | | | | | | | | | | | | | | | | | Isosalipurposide | | | | | | | | | | | | | | F | | | | |
| 60 | [M-H]- | 15.98 | C17H14O6 | 313.0718 | 313.0716 | -0.7 | | | | | | 313.0722(M-H,C17H13O6);298.0499(M-H-CH3,C16H10O6);269.0838(M-H-CH3 -CHO,C15H9O5);253.0510(M-H-CH3-CHO-O,C15H9O4);237.0541(M-H-CH3 -CHO-2O,C15H9O3);225.0558(M-H-CH3-CHO-O-CO,C14H9O3) | | | | | | | | | | | | | | | | | | | Kumatakenin | | | | | | | | | | | | | | F | | | | |
| [M+H]+ | 19.72 | C17H14O6 | 315.0863 | 315.0863 | 0 | | | | | | 315.0867(M+H, C17H15O6);300.0655 (M+H-CH3,C16H12O6); 167.0351(M+H-C9H8O2, C8H7O4);139.0517 (M+H-C9H8O2-CO,C7H7O3) | | | | | | | | | | | | | | | | | | |
| 61 | [M-H]- | 16.39 | C20H30O6 | 365.1970 | 365.1969 | -0.1 | | | | | | 365.1980(M-H,C20H29O6);285.1862(M-H-CO2-2H2O,C19H25O2); 267.1785(M-H-CO2-3H2O,C19H23O);167.1086(M-H-CO2-C9H14O2, C10H15O2);137.0953(M-H-CO2-C9H14O2-2CH3,C8H9O2) | (3aR)-3a,4,5,6,7,7a,8,8a-Octahydro-3aβ,4α,7aβ,8aβ-tetrahydroxy-3,5β,8-trimethyl-2-isopropyl-1H-3bα,8α-(epoxyethano)cyclopent[a]inden-10-one | | | | | | | | | | | | | | | | | | | | | | | | | | | | | | | | | | | | L |
| 62 | [M-H]- | 16.46 | C25H24O14 | 515.1195 | 547.1079 | -0.9 | | | | | | 515.1178(M-H, C25H23O12); 353.0894(M-H-C9H6O3,C16H17O9); 191.0566 (M-H-2C9H6O3,C7H11O6); 179.0356(M-H-C16H16O8,C9H7O4); 173.0458 (M-H-2C9H6O3-H2O,C7H9O5); 135.0452(M-H-C16H16O8-CO2,C8H7O2) | | | | | | | | | | | | | | | | | | | Isochlorogenic acid C* | | | | | | | | | | | | | | P | | | | |
| 63 | [M+H]+ | 16.48 | C20H22O4 | 327.1591 | 327.1591 | -0.1 | | | | | | 327.1643(M+H,C20H23O4);163.0743(M+H-C10H12O2,C10H11O2); 137.0594(M+H-C12H14O2,C8H9O2) | | | | | | | | | | | | | | | | | | | Dehydrodiisoeugenol | | | | | | | | | | | | | | P | | | | |
| 64 | [M-H]- | 16.81 | C20H26O6 | 361.4657 | 361.1656 | -0.3 | | | | | | 361.1683(M-H,C20H25O6);346.1406(M-H-CH3,C19H22O6);179.0712(M-H -C10H14O3,C10H11O3);165.0559(M-H-C10H13O3-CH3,C9H9O3);147.0456(M-H -C10H13O3-CH3-H2O,C9H7O2);121.0292(M-H-C10H13O3-CH3-H2O-C2H2,C7H5O2) | | | | | | | | | | | | | | | | | | | Secoisolariciresinol | | | | | | | | | | | | | | P | | | | |
| 65 | [M+H]+ | 17.03 | C15H10O4 | 255.0652 | 255.0654 | 0.9 | | | | | | 255.0651(M+H, C15H11O4); 145.0274(M+H-C6H6O2, C9H5O2); 137.0226(M+H-C8H6O, C7H5O3) | | | | | | | | | | | | | | | | | | | 7,4'-Dihydroxyflavone | | | | | | | | | | | | | | F | | | | |
| [M-H]- | 17.35 | C15H10O4 | 253.0509 | 253.0509 | 1 | | | | | | 253.0517(M-H, C15H9O4); 135.0097(M-H-C8H6O,C7H3O3); 117.0350(M-H-C7H4O3,C8H5O) | | | | | | | | | | | | | | | | | | |
| 66 | [M+H]+ | 17.13 | C26H30O13 | 551.1759 | 551.1763 | 0.9 | | | | | | 551.1752(M+H, C26H31O13); 257.0816(M+H-C5H8O4-C6H10O5,C15H13O4); 147.0440(M+H-C5H8O4-C6H10O5-C6H6O2,C9H7O2); 137.0230(M+H-C5H8O4-C6H10O5-C8H8O,C7H5O3) | | | | | | | | | | | | | | | | | | | | | | | | | Isoliquiritin apioside* | | | | | | | | F | | | | |
| [M-H]- | 17.44 | C26H30O13 | 549.1614 | 549.1618 | 0.7 | | | | 549.1635(M-H,C26H29O13);255.0675(M-H-C6H10O5-C5H8O4,C15H11O4);135.0097(M -H-C6H10O5-C5H8O4-C8H8O,C7H3O3);119.0509(M-H-C6H10O5-C5H8O4-C7H4O3,C8H7O) | | | | | | | | | | | | | | | | | | | | | | | | | | |
| 67 | [M+H]+ | 17.13 | C21H22O9 | 419.1337 | 419.1339 | 0.7 | | | | | | 419.1329(M+H, C21H23O9);257.0811(M+H-C6H10O5, C15H13O4); 147.0441 (M+H-C6H10O5-C6H6O2, C9H7O2) ; 137.0232(M+H-C6H10O5-C8H8O, C7H5O3) | | | | | | | | | | | | | | | | | Neoisoliquiritin | | | | | | | | | | | | | | | | F | | | | |
| 68 | [M-H]- | 17.14 | C17H16O5 | 299.0925 | 299.0925 | 0 | | | | | | 299.1533(M-H, C17H15O5); 255.1022(M-H-CO-O,C16H15O3); 240.0792(M-H-CO-O-CH3, C15H12O3);239.0721(M-H-CO-O-CH3-H,C15H11O3);119.0496(M-H-C9H8O4,C8H7O) | | | | | | | | | | | | | | | | | | | | | | | | | | | | | | | Farrerol | | F | | | | |
| 69 | [M+H]+ | 17.32 | C27H30O13 | 563.1759 | 563.1760 | 0.1 | | | | | | 563.2794(M+H,C27H31O13);269.0821(M+H-C5H8O4-C6H10O5, C16H13O4) | | | | | | | | | | | | | | | | | | | Glycyroside | | | | | | | | | | | | | | F | | | | |
| 70 | [M+H]+ | 17.35 | C17H18O6 | 319.1176 | 319.1179 | 0.8 | | | | | | 319.1167(M+H, C17H19O6); 153.0543(M+H-C8H10-2CH2O, C7H5O4); 137.0589  (M+H-C7H8-3CH2O,C7H5O3); 123.0433(M+H-C8H10-3CH2O,C6H3O3) | | | | | | | | | | | | | | | | | | | Agarotetrol | | | | | | | | | | | | | | F | | | | |
| 71 | [M+H]+ | 17.49 | C21H22O9 | 419.1337 | 419.1338 | 0.4 | | | | | | 419.1349(M+H, C21H23O9);257.0818(M+H-C6H10O5, C15H13O4); 147.0438 (M+H-C6H10O5-C6H6O2, C9H7O2) ;137.0235(M+H-C6H10O5-C8H8O, C7H5O3) | | | | | | | | | | | | | | | | | | | Isoliquiritin* | | | | | | | | | | | | | | F | | | | |
| [M-H]- | 17.79 | C21H22O9 | 417.1191 | 417.1194 | 0.6 | | | | | | 417.1210(M-H,C21H21O9);255.0679(M-H-C6H10O5,C15H11O4);148.0177 (M-H-C6H10O5-C6H3O2,C9H8O2);135.0096(M-H-C6H10O5-C8H8O,C7H3O3);  119.0509(M-H-C6H10O5-C7H4O3,C8H7O) | | | | | | | | | | | | | | | | | | |
| 72 | [M+H]+ | 17.67 | C22H22O9 | 431.1337 | 431.1336 | -0.1 | | | | | | 431.1348(M+H, C22H23O9); 269.0825(M+H-C6H10O5, C16H13O4); 254.0582(M+H-C6H10O5-CH3, C15H10O4) | | | | | | | | | | | | | | | | | | | Ononin | | | | | | | | | | | | | | F | | | | |
| 73 | [M+H]+ | 17.83 | C16H14O5 | 287.0914 | 287.0916 | 0.7 | | | | | | 287.0960(M+H,C16H15O5 ); 193.0492(M+H-C6H6O, C10H9O4); 150.0308( M+H-C7H6O2-CH3, C8H6O3); 121.0283(M+H-C9H10O3, C7H5O2) | | | | | | | | | | | | | | | | | | | Licochalcone B | | | | | | | | | | | | | | F | | | | |
| [M-H]- | 18.14 | C16H14O5 | 285.0769 | 285.0769 | 0.1 | | | | | | 285.0769(M-H, C16H13O5);270.0542(M-H-CH3,C15H10O5);  150.0329(M-H-CH3 -C7H4O2,C8H6O3);149.0248 (M-H-CH3 -C7H4O2-H,C8H5O3);121.0297(M-H-CH3-C8H5O3,C7H5O2) | | | | | | | | | | | | | | | | | | |
| 74 | [M+H]+ | 17.88 | C15H12O4 | 257.0808 | 257.0813 | 1.3 | | | | | | 257.0811(M+H, C15H13O4); 165.0702(M+H-C6H4O, C9H9O3); 147.0438(M+H-C6H5O-OH, C9H7O2); 137.0236(M+H-C8H8O, C7H5O3); 119.0492(M+H-C8H8O-H2O, C7H3O2); 109.0280(M+H-C8H8O-CO, C6H5O2) | | | | | | | | | | | | | | | | | | | Isoliquiritigenin | | | | | | | | | | | | | | F | | | | |
| 75 | [M-H]- | 18.19 | C15H12O5 | 271.0614 | 271.0612 | 0.8 | | | | | | 271.0615(M-H,C15H11O5); 253.500(M-H-H2O,C15H9O4); 243.0675(M-H-CO,C14H11O4) | | | | | | | | | | | | | | | | | | | Toralactone | | | | | | | | | | | | | | P | | | | |
| 76 | [M-H]- | 18.39 | C15H10O6 | 285.0405 | 285.0402 | -0.9 | | | | | | 285.0410(M-H,C15H9O6);257.0469(M-H-CO,C14H9O5);177.0212 (M-H-C6H4O2, C9H5O4);150.0309(M-H-C8H7O2,C7H2O4);133.0314(M-H-C7H4O4,C8H5O2) | | | | | | | | | | | | | | | | | | | Kaempferol | | | | | | | | | | | | | | F | | | | |
| 77 | [M+H]+ | 18.61 | C12H16O3 | 209.1172 | 209.1173 | 0.5 | | | | | | 209.1075(M+H, C12H17O3);167.1064(M+H-C3H6, C9H11O3); 149.0961(M+H-2CH2O, C10H13O);107.0849(M+H-2CH2O-C3H6, C7H7O) | | | | | | | | | | | | | | | | | | | α-Asarone | | | | | | | | | | | | | | P | | | | |
| 78 | [M+H]+ | 19.06 | C16H12O5 | 285.0758 | 285.0760 | 0 | | | | | | 285.0751(M+H, C16H13O5); 270.0514(M+H-CH3, C15H10O5); 253.0496(M+H-CH4O, C15H9O4); 225.0544(M+H-CH4O-CO, C14H9O3); 197.0586(M+H-CH4O-2CO, C13H9O2) | | | | | | | | | | | | | | | | | | | | | | | | Physcion | | | | | | | | | AN | | | | |
| 79 | [M-H]- | 19.31 | C9H8O2 | 147.0452 | 147.0453 | 0.9 | | | | | | 147.0411(M-H, C9H7O2);103.0549(M-H-CO2,C8H7) | | | | | | | Cinnamic acid* | | | | | | | | | | | | | | | | | | | | | | | | | | OA | | | | |
| 80 | [M+H]+ | 19.67 | C16H16O5 | 289.1071 | 289.1070 | -0.1 | | | | | | 187.0737(M+H-C4H6O3,C12H11O2) ;161.0590(M+H-C6H8O3,C10H9O2); 118.0401(M+H-C8H11O4,C8H6O) | | | | | | | | | | | | | | | | | | | Columbianetin acetate | | | | | | | | | | | | | | P | | | | |
| 81 | [M-H]- | 21.26 | C15H12O5 | 271.0614 | 271.0614 | 0.8 | | | | | | 271.0615(M-H,C15H11O5);151.0040(M-H-C8H8O,C7H3O4); 119.0508(M-H-C7H4O4,C8H7O);107.0141(M-H-C8H8O-CO-O,C6H3O2) | | | | | | | | | | | | | | | | | | | Naringenin | | | | | | | | | | | | | | F | | | | |
| 82 | [M-H]- | 21.27 | C42H66O16 | 825.4278 | 825.4281 | 0.3 | | | | | | 825.4324(M-H, C42H65O16);351.0574(M-H-C6H10O5 -C5H8O4-C2H2O2-CO2-H2O-CH2O-2CH3, C25H35O) | | | | | | | | | | | | | | | | | | | Esculentoside A | | | | | | | | | | | | | | T | | | | |
| 83 | [M-H]- | 21.60 | C16H14O4 | 269.0822 | 269.0822 | 1 | | | | | | 269.0825(M-H,C16H13O4);237.0569(M-H-CH4O,C15H9O3) ; 209.0609  (M-H-CH4O-CO,C14H9O2) ;175.0403(M-H-C6H6O,C10H7O3);161.0248  (M-H-C6H5O-CH3,C9H5O3); 133.0295(M-H-C7H5O2-CH3,C8H5O2) ; 120.0216(M-H-C9H9O2,C7H4O2);108.0207(M-H-C9H6O2-CH3,C6H4O2) | | | | | | | | | | | | | | | | | | | Retrochalcone | | | | | | | | | | | | | | F | | | | |
| 84 | [M+H]+ | 21.77 | C16H12O5 | 285.0758 | 285.0760 | 0.9 | | | | | | 285.0784(M+H, C16H13O5); 225.0555(M+H-CH3-OH-CO, C14H9O3); 137.0231(M+H-C9H8O2,C7H5O3) | | | | | | | | | | | | | | | | | | | Calycosin | | | | | | | | | | | | | | F | | | | |
| 85 | [M+H]+ | 24.91 | C16H12O4 | 269.0808 | 269.0810 | 0.8 | | | | | | 269.0815(M+H, C16H13O4 ); 253.0503(M+H-O, C16H13O3);  237.0547(M+H -CH4O, C15H9O3); 225.0544(M+H-O-CO, C15H13O2); 118.0409(M+H-C7H4O3-CH3, C8H6O) | | | | | | | | | | | | | | | | | | | Formononetin | | | | | | | | | | | | | | F | | | | |
| [M-H]- | 25.47 | C16H12O4 | 267.0665 | 267.0668 | 0.7 | | | | | | 267.0664(M-H,C16H11O4); 252.0430(M-H-CH3,C15H8O4); 251.0352(M-H-CH3-H,C15H7O4); 223.0399(M-H-CH3-H-CO,C14H7O3); 135.0085(M-H-C9H8O,C7H3O3); 132.0210(M-H-C7H4O3,C9H7O) | | | | | | | | | | | | | | | | | | |
| 86 | [M-H]- | 25.10 | C30H46O6 | 501.3222 | 501.3213 | -1.2 | | | | | | 501.3234(M-H,C30H45O6);457.3310(M-H-CO2,C29H45O4);441.3107 (M-H-C2H4O2,C28H41O4);403.2496(M-H-C6H10O,C24H35O5);  385.2360(M-H-C6H10O-H2O,C24H33O4) | | | | | | | | | | | | | | | | | | | 26-Hydroxyporicoic acid G | | | | | | | | | | | | | | T | | | | |
| 87 | [M-H]- | 26.23 | C16H16O4 | 271.0976 | 271.0976 | 0.2 | | 271.1000(M-H,C16H15O4);256.0719(M-H-CH3,C15H12O4);241.0512(M-H-CH2O,C15H13O3);149.0600(M-H-C7H6O2,C9H9O2);135.0447(M-H-CH2O-C6H2O2, C9H11O);121.0296(M-H-C9H10O2,C7H5O2);109.0305(M-H-CH2O-C9H8O,C6H5O2) | | | | | | | | | | | | | | | | | | | | | | | 7,4'-Dihydroxy-3'-methoxyisoflavan | | | | | | | | | | | | | | F | | | | |
| 88 | [M+H]+ | 28.84 | C42H62O17 | 839.4060 | 839.4071 | 1 | | | | | | 839.4108(M+H, C42H63O17); 487.3431(M+H-2C6H8O6, C30H47O5); 469.3325 (M+H-2C6H8O6-H2O, C30H45O4); 451.3213(M+H-2C6H8O6-2H2O, C30H43O3) | | | | | | | | | | | | | | | | | | | Licoricesaponin G2 | | | | | | | | | | | | | | T | | | | |
| 89 | [M+H]+ | 29.53 | C32H48O5 | 513.3575 | 513.3570 | -1 | | | | | | 513.3575(M+H, C32H49O5); 495.3490(M+H-H2O, C32H47O4); 453.3337(M+H-C2H4O2, C30H45O3) | | | | | | | | | | | | | | | | | | | Poricoic acid AM | | | | | | | | | | | | | | T | | | | |
| 90 | [M+H]+ | 30.62 | C42H62O17 | 839.4060 | 839.4068 | 1 | | | | | | 839.4079(M+H, C42H63O17); 487.3414(M+H-2C6H8O6, C30H47O5); 469.3308 (M+H-2C6H8O6-H2O, C30H45O4); 451.3499(M+H-2C6H8O6-2H2O, C30H43O3) | | | | | | | | | | | | | | | | | | | Uralsaponin N | | | | | | | | | | | | | | T | | | | |
| 91 | [M+H]+ | 30.79 | C42H62O16 | 823.4111 | 823.4117 | 0.7 | | | | | | 823.4148(M+H, C42H63O16); 647.3825(M+H-C6H8O6, C36H55O10); 471.3493 (M+H-2C6H8O6, C30H47O4); 453.3386(M+H-2C6H8O6-H2O, C30H45O3) | | | | | | | | | | | | | | | | | | | Glycyrrhizic acid* | | | | | | | | | | | | | | T | | | | |
| 92 | [M+H]+ | 30.80 | C36H54O10 | 647.3790 | 647.3791 | 0.2 | | | | | | 647.3816 (M+H, C36H55O10);471.3486(M+H-C6H8O6, C30H47O4); 453.3402(M+H-C6H8O6-H2O, C30H45O3) ;435.3273(M+H-C6H8O6-2H2O, C30H43O2); 407.3320(M+H-C6H8O6-2H2O-CO, C29H43O) | | | | | | | | | | | | | | | | | | | Glycyrrhetinic acid 3-O-glucuronide | | | | | | | | | | | | | | | T | | | |
| 93 | [M-H]- | 33.83 | C20H18O4 | 321.1132 | 321.1129 | -0.9 | | | | | | 321.1142(M-H,C20H17O4);306.0906(M-H-CH3,C19H14O4);305.0833(M-H-O, C20H17O3);291.0666(M-H-2CH3,C18H11O4);199.0793(M-H-C7H6O2,C13H11O2); 175.0775(M-H-C9H6O2,C11H11O2);145.0266(M-H-C11H12O2,C9H5O2); 107.0501(M-H-C9H6O2-C4H4O,C7H7O) | | | | | | | | | | | | | | | | | | | Glabrene | | | | | | | | | | | | | | F | | | | |
| 94 | [M+H]+ | 32.00 | C21H22O5 | 355.1537 | 355.1537 | -1 | | | | | | 355.1557(M+H, C21H23O5); 299.0914(M+H-C4H8, C17H15O5); 193.0496(M+H-C11H14O, C10H9O4); 133.0282(M+H-C8H8O3-C5H10, C8H5O2) | | | | | | | | | | | | | | Licobenzofuran | | | | | | | | | | | | | | | | | | | P | | | | |
| 95 | [M-H]- | 32.30 | C15H22O3 | 249.1496 | 249.1497 | 0.4 | | | | | | 249.1504(M-H,C15H21O3);205.1605(M-H-CO-O,C14H21O);  203.1450(M-H-2CH3-O,C13H15O2);189.1266(M-H-CO-2O,C14H21);  187.1134(M-H-CH3-2O,C13H15O) | | | | | | | | | | | | | | Nardosinone | | | | | | | | | | | | | | | | | | | O | | | | |
| 96 | [M-H]- | 32.71 | C15H20O3 | 247.1338 | 247.1338 | -0.7 | | | | | | 247.1326(M-H,C15H19O3); 229.1215(M-H-H2O,C15H17O2); 203.1450(M-H-CO2,C14H19O) ,201.1287(M-H-H2O-CO,C14H17O) | | | | | | | | | | | | | | Atractylenolide Ⅲ* | | | | | | | | | | | | | | | | | | | L | | | | |
| 97 | [M+H]+ | 32.78 | C20H20O4 | 325.1434 | 325.1437 | 0.8 | | | | | | 325.1401(M+H, C20H21O4); 269.0845(M+H-C4H8,C16H13O4 ); 137.0239(M+H-C5H9-C8H7O, C7H5O3) | | | | | | | | | | | | | | Isobavachalcone | | | | | | | | | | | | | | | | | | | F | | | | |
| [M-H]- | 33.08 | C20H20O4 | 323.1289 | 323.1287 | -0.8 | | | | | | 323.1294(M-H,C20H19O4);187.1132(M-H-C6H5-CO2-CH3,C12H11O2); 135.0092(M-H-C8H8-C4H7-CO-H,C7H3O3); 132.0592(M-H-C6H5-CO2-CH3-C4H7,C8H4O2) | | | | | | | | | | | | | |
| 98 | [M+H]+ | 33.72 | C21H24O5 | 357.1697 | 357.1676 | 0.8 | | | | | | 357.1609(M+H, C21H25O5); 301.1083(M+H-C4H8, C17H17O5); 179.0698(M+H-C6H5O2-C5H9, C10H11O3);165.0544(M+H -C7H6O2-C5H10,  C9H9O3); 123.0441(M+H-C9H9O3-C5H9, C7H7O2) | | | | | | | | | | | | | | | | | | | | | | | | | | | Glyasperin C | | | | | | P | | | | |
| [M-H]- | 33.99 | C21H24O5 | 355.1551 | 355.1549 | -0.5 | | | | | 355.1546(M-H,C21H23O5);323.1310(M-H-CH4O,C20H19O4);233.1169(M-H-C7H6O2,  C14H17O3);175.0400(M-H-C5H10-C6H6O2,C10H7O3);163.0393(M-H-C12H16O2,C9H7O3);135.0453(M-H-C13H16O3,C8H7O2);109.0281(M-H-C13H16O3-C2H2,C6H5O2) | | | | | | | | | | | | | | | | | | | | | | | | | | | |
| 99 | [M+H]+ | 36.83 | C20H20O4 | 325.1434 | 325.1437 | 0.7 | | | | | | 325.1458(M+H, C20H21O4); 189.0906(M+H-C8H8O2, C12H13O2); 149.0586 (M+H-C11H10O-H2O, C9H9O2); 123.0437(M+H-C12H12O2-CH2, C7H7O2) | | | | | | | | | | | | | | | | | | | Glabridin | | | | | | | | | | | | | | F | | | | |
| [M-H]- | 37.08 | C20H20O4 | 323.1289 | 323.1291 | 0.4 | | | | | | 323.1295(M-H,C20H19O4);201.0919(M-H-C6H4O2-CH2,C13H13O2);135.0445 (M-H-C12H12O2,C8H7O2);109.0302(M-H-C12H12O2-C2H2,C6H5O2);107.0506 (M-H-C12H12O2-C2H2-2H,C6H3O2) | | | | | | | | | | | | | | | | | | |
| 100 | [M-H]- | 32.94 | C20H20O5 | 339.1238 | 339.1236 | -0.7 | | | | | | 339.2029(M-H,C20H19O5);245.0833(M-H-C6H6O,C14H13O4);201.0917(M-H -C6H6O-CO-O,C13H13O2);177.0899(M-H-C9H6O3,C11H13O2) | | | | | | | | | | | | | | | | | | | 8-Prenylnaringenin | | | | | | | | | | | | | | F | | | | |
| 101 | [M+H]+ | 32.97 | C20H20O6 | 357.1333 | 357.1334 | 0.5 | | | | | | 357.1325(M+H, C20H21O6);301.0710(M+H-C4H8, C16H13O6); 283.0602(M+H-C4H8-H2O, C16H11O5);175.0388(M+H-C4H8-H2O-C6H4O2, C10H7O3);147.0437(M+H-C4H8-H2O-C6H4O2-CO, C9H7O2) | | | | | | | | | | | | | | | | | | | Sigmoidin B | | | | | | | | | | | | | | F | | | | |
| [M-H]- | 33.27 | C20H20O6 | 355.1187 | 355.1189 | 0.5 | | | | | | 355.1090(M-H, C20H19O6);229.0883(M-H-C6H4O3-2H,C14H13O3);174.0330 (M-H-C7H3O4-2CH3,C11H10O2);146.0345(M-H-C7H3O4-2CH3-C2H4, C9H6O2);125.0252(M-H-C14H14O3,C6H5O3) | | | | | | | | | | | | | | | | | | |
| 102 | [M-H]- | 33.08 | C31H46O6 | 513.3222 | 513.3209 | -2.5 | | | | | | 513.3221(M-H,C31H45O6);483.3113(M-H-CH2O,C30H43O5); 405.2894(M-H-CH2O-C2H4O2-H2O,C28H37O2) | | | | | | | | | | | | | | | Poricoic acid D | | | | | | | | | | | | | | | | | | T | | | | |
| 103 | [M+H]+ | 33.27 | C20H18O5 | 339.1227 | 339.1230 | 0.8 | | | | | | 339.1231(M+H, C20H19O5); 283.0608(M+H-C4H8,C16H11O5); 201.0546(M+H -C6H6O-CO2,C13H13O2); 137.0223(M+H-C8H6O-C4H8-CO ,C7H5O3) | | | | | | | | | | | | | | | | | | | | | | | | Eurycarpin A | | | | | | | | | F | | | | |
| [M-H]- | 33.56 | C20H18O5 | 337.1082 | 337.1081 | 0.4 | | | | | | 337.1090(M-H,C20H17O5);293.0462(M-H-CO-O,C19H17O3);268.0377(M-H-C5H9, C15H8O5);224.0480(M-H-C5H9-CO-O,C14H8O3);135.0091(M-H-C5H9-C8H5O2, C7H3O3);117.0346(M-H-C5H9-C7H2O3-OH,C8H5O) | | | | | | | | | | | | | | | | | | | | | | | |
| 104 | [M+H]+ | 33.31 | C21H20O6 | 369.1333 | 369.1334 | 0.5 | | | | | | 369.1326(M+H, C21H21O6); 313.0698(M+H-C4H8, C17H13O6 ); 285.0757 (M+H-C4H8-CO, C16H13O5); 270.0520(M+H-C4H8-CO-CH3, C15H10O5); 185.0573(M+H-C6H6O2-CO2-2CH3, C12H9O2) | | | | | | | | | | | | | | | | | | | | | | | | Glycycoumarin | | | | | | | | | P | | | | |
| [M-H]- | 33.59 | C21H20O6 | 367.1187 | 367.1187 | 0 | | | | | | 367.1193 (M-H, C21H19O6);337.0719(M-H-2CH3, C19H13O6);309.0414(M-H-2CH3 -CO,C18H13O5);297.0408(M-H-C5H10,C16H9O6); 284.0336(M-H-2CH3-CO-C2H, C16H12O5);203.0718 (M-H-C6H5O2-C4H7, C11H7O4) ; | | | | | | | | | | | | | | | | | | | | | | | |
| 105 | [M-H]- | 33.67 | C31H50O5 | 501.3586 | 501.3574 | -1.1 | | | | | | 501.3209(M-H,C31H49O5);457.3491(M-H-CO2, C30H49O3); 439.6816(M-H-CO2-H2O,C30H47O2) | | | | | | | | | | 25-Hydroxy-3-epitumulosic acid | | | | | | | | | | | | | | | | | | | | | | | T | | | | |
| 106 | [M-H]- | 34.18 | C31H48O5 | 499.3429 | 499.3414 | -3.0 | | | | | | 499.3403(M-H,C31H47O5);455.3562(M-H-CO2, C30H47O3) | | | | | | | | | | Poricoic acid GM | | | | | | | | | | | | | | | | | | | | | | | T | | | | |
| 107 | [M-H]- | 34.75 | C30H46O5 | 485.3273 | 485.3261 | -1.2 | | | | | | 485.3284(M-H,C30H45O5);387.2550(M-H-C6H10-O,C24H35O4);369.2447(M-H -C6H10-O-H2O,C24H33O3);325.2159(M-H-C6H10-O-H2O-CO2,C23H33O) | | | | | | | | | | Poricoic acid G | | | | | | | | | | | | | | | | | | | | | | | T | | | | |
| 108 | [M-H]- | 35.10 | C32H48O7 | 543.3327 | 543.3311 | -2.9 | | | | | | 543.3333(M-H,C32H47O7);445.2609(M-H-C6H10O,C26H37O6); 427.2510(M-H-C6H10O-H2O,C26H35O5) | | | | | | | | | | 26-Hydroxyporicoic acid DM | | | | | | | | | | | | | | | | | | | | | | | T | | | | |
| 109 | [M+H]+ | 35.27 | C21H22O4 | 339.1591 | 339.1592 | 0.4 | | | | | | 339.1586(M+H, C21H23O4); 297.1477(M+H-CO-CH2, C19H21O3 ); 245.1172(M+H-C6H6O, C15H17O3);177.0536(M+H-C7H6O2-C2H2-CH2, C11H13O2); 121.0282(M+H-C14H18O2, C7H5O2 ) | | | | | | | | | | | | | | | | | | | | | | Licochalcone A* | | | | | | | | | | | F | | | | |
| [M-H]- | 35.53 | C21H22O4 | 337.1445 | 337.1446 | 0.3 | | | | | | 337.145(M-H,C21H21O4);305.1174(M-H-CH4O,C20H17O3);229.0873(M-H-C6H5O-CH3,C14H13O3);201.0923(M-H-C6H5O-CH3-CO,C13H13O2);187.0761(M-H  -C7H3O2-CH3O,C13H15O);161.0613(M-H-C7H3O2-CH3O-C2H2,C11H13O) | | | | | | | | | | | | | | | | | | | | | |
| 110 | [M+H]+ | 35.31 | C22H22O6 | 383.1489 | 383.1489 | -0.1 | | | | | | 327.0870(M+H-C4H8, C18H15O6);299.0917(M+H-C4H8-CO, C17H15O5) ; 137.0234(M+H-C11H10O3, C7H5O3) | | | | | | | | | | | | | | | | | | | | | | | | | | | | | | | | Licoricone | F | | | | |
| [M-H]- | 35.58 | C22H22O6 | 381.1344 | 381.1340 | -0.9 | | | 381.1349(M-H,C22H21O6);351.0876(M-H-2CH3,C20H15O6);323.0581(M-H-2CH3-CO, C19H15O5);307.0966(M-H-2CH3-CO-O,C19H15O4);279.0303(M-H-CH3O-C5H11,C16H7O5) | | | | | | | | | | | | | | | | | | | | | | | | | | | | | | | | | | |
| 111 | [M-H]- | 35.39 | C31H46O6 | 513.3222 | 513.3205 | -3.2 | | | | | | 513.3200(M-H,C31H45O6);481.3324(M-H-O2,C31H45O4); 466.3098(M-H-O2-CH3,C30H42O4) | | | | | | | | | | | | | | | | | | Peroxydehydrotumulosic acid | | | | | | | | | | | | | | | T | | | | |
| 112 | [M-H]- | 35.51 | C20H20O5 | 339.1238 | 339.1241 | 0.9 | | | | | | 339.1510(M-H,C20H19O5);187.1134(M-H-CH3-CO-C6H5O2,C12H11O2);132.0588(M-H-CH3-CO-C6H5O2-C4H7,C8H4O2);151.0042(M-H-C8H5O2-C4H7,C8H7O3) | | | | | | | | | | | | | | | | | | | | | | | | Corylifol B | | | | | | | | | F | | | | |
| 113 | [M+H]+ | 35.73 | C21H18O6 | 367.1176 | 367.1177 | 0.3 | | | | | | 367.1180(M+H,C21H19O6);311.0552(M+H-C4H8, C17H11O6); 297.0387(M+H-C4H8-CH2, C16H9O6);296.0310(M+H-C4H8-CH3, C16H8O6);253.0484(M+H-C4H8-CH2-CO2, C15H9O4) | | | | | | | | | | | | | | | | | | | | | | | | | | | | Glycyrol | | | | | P | | | | |
| 114 | [M-H]- | 35.99 | C20H18O5 | 337.1082 | 337.1082 | 0 | | | | | | 337.1092(M-H,C20H17O5);293.0471(M-H-CO-O,C19H17O3); 281.0464(M-H-C4H8,C16H9O5) | | | | | | | | | | | | | | | | | | | | | | | | Licoflavone C | | | | | | | | | F | | | | |
| [M+H]+ | 36.31 | C20H18O5 | 339.1227 | 339.1223 | -1.2 | | | | | | 339.1323(M+H, C20H19O5); 283.0590(M+H-C4H8,C16H11O5); 271.0582(M+H-C5H8,C15H11O5); 255.0640(M+H-C4H8-CO,C15H11O4) | | | | | | | | | | | | | | | | | | | | | | | |
| 115 | [M+H]+ | 36.17 | C20H16O5 | 337.1071 | 337.1074 | 0.7 | | | | | | 337.1073(M+H, C20H17O5) ;295.0610 (M+H-C3H6, C17H11O5); 201.0548(M+H -C7H4O3,C13H13O2); 137.0232(M+H-C13H12O2, C7H5O3) | | | | | | | | | | | | | | | | | | | | | | | | Glabrone | | | | | | | | | F | | | | |
| [M-H]- | 36.43 | C20H16O5 | 335.0925 | 335.0929 | 0.7 | | | | | | 335.0940(M-H,C20H15O5);320.0697(M-H-CH3,C19H12O5);319.0623(M-H-O, C20H15O4);305.0460(M-H-2CH3,C18H9O5);307.0981(M-H-CO,C19H15O4); 291.1035(M-H-O-CO,C19H15O3);261.0578(M-H-O-CO-2CH3,C17H9O3); 199.0768(M-H-C7H4O3,C13H11O2);183.0457(M-H-C7H4O3-O,C13H11O); 135.0091(M-H-C13H12O2,C7H3O3);107.0503(M-H-C13H12O2-CO,C6H3O2) | | | | | | | | | | | | | | | | | | | | | | | |
| 116 | [M+H]+ | 36.90 | C15H20O2 | 233.1536 | 233.1538 | 0.7 | | | | | | 233.1539(M+H, C15H21O2); 215.1430(M+H-H2O, C15H19O); 187.1478(M+H-H2O-CO, C14H19); 131.0850(M+H-H2O-CO-C4H8, C10H11); 105.0695 (M+H-H2O-CO-C6H10, C8H9) | | | | | | | | | | | | | | | | | | | | | | | | Atractylenolide Ⅱ* | | | | | | | | | P | | | | |
| 117 | [M-H]- | 37.08 | C20H20O5 | 339.1238 | 339.1235 | -0.9 | | | | | | 339.1991(M-H,C20H19O5);201.0956(M-H-CH3O-C6H3O2,C13H13O2); 183.0130(M-H-CH3O-O-C6H5O2,C13H11O) | | | | | | | | | | | | | | | | | | | | | | | | Licocoumarone | | | | | | | | | P | | | | |
| 118 | [M+H]+ | 37.35 | C20H20O4 | 325.1434 | 325.1433 | -0.6 | | | | | | 325.1448(M+H, C20H21O4); 137.0236(M+H-C8H8-C4H8-CO, C7H5O3); 103.0537(M+H-C12H14O4, C8H7) | | | | | | | | | | | | | | | | | | | | | | | | Glabranin | | | | | | | | | F | | | | |
| [M-H]- | 37.59 | C20H20O4 | 323.1289 | 323.1286 | -0.9 | | | | | | 323.1242(M-H,C20H19O4);187.1129(M-H-C6H5O-CO-CH3,C12H11O2); 135.0064(M-H-C8H7O-C5H9,C7H3O3); 132.0582(M-H-C6H5O-CO-CH3-C4H7,C8H4O2) | | | | | | | | | | | | | | | | | | | | | | | |
| 119 | [M+H]+ | 37.53 | C20H16O6 | 353.1020 | 353.1021 | 0.5 | | | | | | 353.1022 (M+H, C20H17O6); 311.0544(M+H-C3H6, C17H11O6 );  217.0487(M+H-C7H4O3, C13H13O3); 153.0180(M+H-C13H12O2, C7H5O4) | | | | | | | | | | | | | | | | | | | | | | | | Semilicoisoflavone B | | | | | | | | | F | | | | |
| 120 | [M-H]- | 37.78 | C20H16O6 | 351.0874 | 351.0877 | 0.7 | | | | | | 351.0898(M-H,C20H15O6);283.0998(M-H-C5H8,C15H7O6); 241.0888(M-H-C5H6O-CO,C14H9O4);199.0774(M-H-C7H4O4,C13H11O2) | | | | | | | | | | | | | | | | | | | | | | | | Licoisoflavone B | | | | | | | | | F | | | | |
| 121 | [M-H]- | 38.09 | C32H48O6 | 527.3378 | 527.3371 | -1.4 | | | | | | 527.2608(M-H,C32H47O6);485.3285(M-H-C3H6,C29H41O6);467.3184(M-H -C3H6-H2O,C29H39O5);423.3280(M-H-C3H6-H2O-CO2,C28H39O3); 408.2983(M-H-C3H6-H2O-CO2-CH3,C27H36O3) | | | | | | | | | | | | | | | | | | | | | | | | Poricoic acid DM | | | | | | | | | T | | | | |
| 122 | [M+H]+ | 38.21 | C22H22O6 | 383.1489 | 383.1491 | 0.4 | | | | | | 383.1495(M+H, C22H23O6);299.0917(M+H-C4H8-CO, C17H15O5) ; 284.0660(M+H-C4H8-CO-CH3, C16H12O5) | | | | | | | | | | | | | | | | | | | | | | | | Glycyrin | | | | | | | | | P | | | | |
| 123 | [M+H]+ | 38.59 | C20H16O5 | 337.1071 | 337.1074 | 0.9 | | | | | | 337.1083(M+H, C20H17O5) ;295.0599 (M+H-C3H6, C17H11O5); 153.0182(M+H-C13H12O, C7H5O4) | | | | | | | | | | | | | | | | | | | | | | | | Isoderrone | | | | | | | | | F | | | | |
| 124 | [M+H]+ | 38.79 | C25H26O4 | 391.1904 | 391.1907 | 0.9 | | | | | | 391.1918(M+H, C25H27O4); 335.1288(M+H-C4H8, C21H19O4); 279.0656(M+H-2C4H8,C17H11O4);149.0229(M+H-C13H14O-C4H8, C8H5O3) | | | | | | | | | | | | | | | | | | | | | Licoflavone B | | | | | | | | | | | | F | | | | |
| 125 | [M+H]+ | 39.18 | C25H28O4 | 393.2060 | 393.2063 | 0.6 | | | | | | 393.2057(M+H, C25H29O4); 337.1436(M+H-C4H8, C21H21O4); 149.0234(M+H-C4H8-C13H16O, C8H5O3) | | | | | | | | | | | | | | | | | | | | | | | | Glabrol | | | | | | | | | F | | | | |
| [M-H]- | 39.40 | C25H28O4 | 391.1915 | 391.1917 | 0.5 | | | | | | 391.1916(M-H,C25H27O4);203.0720(M-H-C13H16O, C12H11O3);187.1137 (M-H-C12H12O3, C13H15O);132.0584(M-H-C12H12O3-C4H7, C9H8O) | | | | | | | | | | | | | | | | | | | | | | | |
| 126 | [M+H]+ | 39.75 | C22H26O5 | 371.1853 | 371.1856 | 0.8 | | | | | | 181.0860(M+H-C8H6O2-C4H8,C10H13O3); 167.0700 (M+H-C9H8O2 -C4H8,C9H11O3); 137.0589(M+H-C14H18O3,C8H9O2); 123.0441(M+H-C9H10O2-C5H10-2CH2,C6H3O3) | | | | | | | | | | | | | | | | | | | | | | | | Glyasperin D | | | | | | | | | F | | | | |
| [M-H]- | 39.98 | C22H26O5 | 369.1707 | 369.1707 | 0 | | | | | | 369.1725(M-H,C22H25O5) ; 339.1247 (M-H-2CH3,C20H19O5); 221.1183(M-H-C9H8O2,C13H17O3); 203.0728(M-H-C6H6O2-C4H8, C12H11O3); 135.0453(M-H-C14H18O3, C8H7O2) ; 109.0925(M-H-C14H18O3-C2H2, C6H5O2) | | | | | | | | | | | | | | | | | | | | | | | |
| 127 | [M+H]+ | 39.95 | C15H18O2 | 231.1380 | 231.1381 | 0.9 | | | | | | 231.1381(M+H, C15H19O2); 203.1087(M+H-CO, C14H19O); 185.1325(M+H-2CH3-O, C13H13O); 157.1011(M+H-2CH3-O-CO, C12H13); 143.0846(M+H-C3H8-CO2, C11H11); 128.0615(M+H-C4H8O2-CH3,C10H8) | | | | | | | | | | | | | | | | | | | | | | | | Atractylenolide I* | | | | | | | | | L | | | | |
| 128 | [M-H]- | 40.64 | C30H44O5 | 483.3116 | 483.3105 | -2.2 | | | | | | 483.3079(M-H,C30H43O5);409.2729(M-H-C3H6O2,C27H37O3) | | | | | | | | | | | | Poricoic acid B* | | | | | | | | | | | | | | | | | | | | | T | | | | |
| 129 | [M-H]- | 40.84 | C31H48O4 | 483.3480 | 483.3471 | -1.8 | | | | | | 483.3483(M-H,C31H47O4);439.3550(M-H-CO2,C30H47O2); 313.2218(M-H-C9H15O2-CH3,C21H29O2) | | | | | | | | Dehydrotumulosic acid* | | | | | | | | | | | | | | | | | | | | | | | | | T | | | | |
| 130 | [M-H]- | 41.35 | C31H50O4 | 485.3636 | 485.3626 | -0.2 | | | | | | 485.3639(M-H,C31H49O4);423.3196(M-H-H2O-CO2,C30H47O) | | | | | | | | | | | | | | | | | | | | Tumulosic acid | | | | | | | | | | | | | T | | | | |
| 131 | [M+H]+ | 41.83 | C25H26O6 | 423.1802 | 423.1802 | -0.1 | | | | | | 423.1807(M+H,C25H27O6);367.1182 (M+H-C4H8,C21H19O6);  311.0550 (M+H-C5H8-CO2, C19H19O4) | | | | | | | | | | | | | | | | | | | | Sanggenol L | | | | | | | | | | | | | F | | | | |
| 132 | [M-H]- | 42.04 | C25H26O6 | 421.1657 | 421.1656 | -0.2 | | | | | | 421.1663(M-H,C25H25O6);377.1038(M-H-CO-O,C24H25O4);365.1027(M-H-C4H8,C21H17O6);352.0956(M-H-C5H9,C20H16O6);309.0404(M-H-2C4H8,C17H9O6) | | | | | | | | | | | | | | | | | | | | Isoangustone A | | | | | | | | | | | | | F | | | | |
| 133 | [M-H]- | 42.09 | C31H46O5 | 497.3272 | 497.3261 | -2.2 | | | | | | 497.3272(M-H,C31H45O5);424.2994(M-H-C3H5O2,C28H40O3);423.2922(M-H -C3H5O2-H,C28H39O3);379.2940(M-H-C3H5O2-H-CO2,C27H39O) | | | | | | | | | | | | | | | | | | | | Poricoic acid A* | | | | | | | | | | | | | T | | | | |
| 134 | [M-H]- | 42.09 | C32H48O6 | 527.3378 | 527.3363 | -2.8 | | | | | | 527.3402(M-H,C32H47O6);481.2919(M-H-CH2O2,C31H45O4);429.2676 (M-H-C6H10O,C26H37O5);411.2540(M-H-C6H10O-H2O,C26H35O4) | | | | | | | | | | | | | | | | | | | | 25-Methoxyporicoic acid A | | | | | | | | | | | | | T | | | | |
| 135 | [M+H]+ | 42.49 | C21H20O5 | 353.1384 | 353.1385 | 0.6 | | | | | | 353.1409(M+H, C21H21O5);297.0764(M+H-C4H8, C17H13O5); 267.0642 (M+H-C4H8-CH2O, C16H11O4); 239.0698(M+H-C4H8-CH2O-CO, C15H11O3); 149.0219(M+H-C12H12O3, C9H9O2); 121.0283(M+H-C12H12O3-CO, C8H9O) | | | | | | | | | | | | | | | | | | | | Gancanin M | | | | | | | | | | | | | F | | | | |
| 136 | [M-H]- | 42.51 | C30H46O4 | 469.3324 | 469.3313 | -2 | | | | | | 469.3324(M-H,C30H45O4);425.3417(M-H-CO2,C29H45O2) | | | | | | | | | 16α-Hydroxydehydrotrametenolic acid | | | | | | | | | | | | | | | | | | | | | | | | | | | T | |
| 137 | [M-H]- | 42.51 | C30H46O4 | 469.3323 | 469.3313 | -2.1 | | | | | | 469.3324(M-H, C30H45O4);425.3417(M+H-CO2,C29H45O2 ) | | | | | | Glycyrrhetinic acid* | | | | | | | | | | | | | | | | | | | | | | | | | | | T | | | | |
| 138 | [M-H]- | 42.75 | C33H52O6 | 543.3691 | 543.3678 | -2.5 | | | | | | 543.3699(M-H,C33H51O6);467.3575(M-H-C2H3O-H2O-CH3,C30H43O4) | | | | | 25-Hydroxypachymic acid | | | | | | | | | | | | | | | | | | | | | | | | | | | | T | | | | |
| 139 | [M-H]- | 42.90 | C31H46O4 | 481.3323 | 481.3312 | -1.7 | | | | | | 481.3320(M-H,C31H45O4);421.3029(M-H-C2H4O2, C29H41O2) | | | | | | Polyporenic acid C* | | | | | | | | | | | | | | | | | | | | | | | | | | | T | | | | |
| 140 | [M+H]+ | 43.64 | C25H26O5 | 407.1853 | 407.1852 | -0.4 | | | | | | 407.2925(M+H, C25H27O5); 351.1214(M+H-C4H8, C21H19O5) ; 295.0601 (M+H-C4H8-C4H8, C17H11O5) ;177.0176(M+H-C4H8-C4H8-C8H6O, C9H5O4) | | | | | | | | | | | | | | | | | | | | | | | | 6,8-Diprenylgenistein | | | | | | | | | F | | | | |
| [M-H]- | 44.75 | C25H26O5 | 405.1708 | 405.1704 | -1 | | | | | | 405.1703(M-H,C25H25O5);219.0677(M-H-C8H6O-C5H8,C12H11O4); 185.0979(M-H-C5H9-C6H4O-CH3-CO2,C12H9O2) | | | | | | | | | | | | | | | | | | | | | | | |
| 141 | [M+H]+ | 44.55 | C25H26O5 | 407.1853 | 407.1855 | -0.4 | | | | | | 407.1882(M+H,C25H27O5);351.1233(M+H-C4H8,C21H19O5 );187.1135(M+H -C12H12O4,C13H15O);165.0182(M+H-C4H8-C13H14O,C8H5O4);137.0240(M+H -C4H8-C13H14O-CO,C7H5O3) | | | | | | | | | | | | | | | | | | | | | | | | Isolupalbigenin | | | | | | | | | F | | | | |
| 142 | [M-H]- | 44.62 | C30H44O4 | 467.3167 | 467.3159 | -3.5 | | | | | | 467.3192(M-H,C30H43O4);423.3277(M-H-CO2,C29H43O2) | | 16-Deoxyporicoic acid B | | | | | | | | | | | | | | | | | | | | | | | | | | | | | | | T | | | | |
| 143 | [M-H]- | 46.73 | C32H50O5 | 513.3586 | 513.3568 | -3.4 | | | | | | 513.3585(M-H,C32H49O5);451.3157(M-H-CO2-H2O,C31H47O2) | | Poricoic acid HM | | | | | | | | | | | | | | | | | | | | | | | | | | | | | | | T | | | | |
| 144 | [M-H]- | 47.03 | C30H48O3 | 455.3530 | 455.3524 | -1.5 | | | | | | 455.3528(M-H,C30H47O3);339.2696(M-H-CO2-H2O-C4H6, C25H39) | | Trametenolic acid | | | | | | | | | | | | | | | | | | | | | | | | | | | | | | | T | | | | |
| 145 | [M-H]- | 47.39 | C33H50O5 | 525.3578 | 525.3578 | -1.4 | | | | | | 525.3587(M-H,C33H49O5);481.3641(M-H-CO2, C32H49O3) | | Dehydropachymic acid | | | | | | | | | | | | | | | | | | | | | | | | | | | | | | | T | | | | |
| 146 | [M+H]+ | 48.01 | C33H52O5 | 529.3886 | 529.3890 | 0.2 | 511.3770(M+H-H2O,C33H51O4);451.3562(M+H-H2O-C2H4O2, C31H47O2); 355.2625 (M+H-H2O-C2H4O2-C7H12, C24H35O2); 295.2422(M+H-H2O-C2H4O2-C7H12-C2H4O2, C22H31) | | | | | | | | | | | | | | | | | | | | | | | | | | | | | | | | | | Pachymic acid* | | | | T | | | | |
| [M-H]- | 48.15 | C33H52O5 | 527.3742 | 527.3736 | -0.4 | | | | | | 527.3737(M-H,C33H51O5);467.3529(M-H-C2H4O2, C31H47O3); 465.3368(M-H-CO2-H2O, C32H49O2); 405.3179(M-H-CO2-H2O-C2H4O2, C30H45); 293.1899(M-H-CO2-H2O-C2H4O2-C8H16,C22H29) | | | | | | | | | | | | | | | | | | | | | | | | | | | | |
| 147 | [M-H]- | 49.88 | C16H30O2 | 253.2173 | 253.2176 | 0.5 | | | | | | 253.2179(M-H,C16H29O2);235.2044(M-H-H2O,C16H27O) | | Sclareol Glycol | | | | | | | | | | | | | | | | | | | | | | | | | | | | | | | O | | | | |
| 148 | [M-H]- | 50.65 | C30H46O3 | 453.3374 | 453.3365 | -3.4 | | | | | | 453.3380(M-H,C30H45O3) | | | 3β-Hydroxylanosta-7,9(11),24-trien-21-oic acid* | | | | | | | | | | | | | | | | | | | | | | | | | | | | | | | | | T | |
| 149 | [M-H]- | 52.30 | C31H48O3 | 467.3531 | 467.3527 | -0.8 | | | | | | 467.3516(M+H, C31H47O3);339.1988(M-H-C5H9-CO2-CH3, C24H35O) | | | | | | | | | | | | | | | | | | | | | | | | Dehydroeburicoic acid | | | | | | | | | T | | | | |

Note: *Identified by comparing with reference standards. F: flavonoids; T: triterpenoids; P: phenylpropanoids; OA: organic acids; AL: alkaloids; L: lactones; AL: alkaloids; AN: anthraquinones; O: other types.
